# Supplementary material for: Effectiveness of robot-assisted training added to conventional rehabilitation in patients with humeral fracture early after surgical treatment: protocol of a randomised, controlled, multicentre trial
Source: PubMed Central journal article supplement (PMC5719790; doi:10.1186/s13063-017-2274-z), 2017-12-06
Supplement: 13063_2017_2274_MOESM2_ESM.pdf [file 13063_2017_2274_MOESM2_ESM.pdf]

Figure 4. Schedule of enrolment, interventions, and assessments

|                                            | STUDY PERIOD           |                        |            |                                        |                                     |                                     |                                      |
|--------------------------------------------|------------------------|------------------------|------------|----------------------------------------|-------------------------------------|-------------------------------------|--------------------------------------|
|                                            | Post-allocation        |                        |            |                                        |                                     |                                     |                                      |
|                                            | Enrolment<br>(surgery) | Baseline<br>(clinical) | Allocation | Follow up 1<br>(clinical)<br>3-5 weeks | Follow up 2<br>(postal)<br>3 months | Follow up 3<br>(postal)<br>6 months | Follow up 4<br>(postal)<br>12 months |
| TIMEPOINT                                  | $-t_1$                 | 0                      | $t_1$      | $t_2$                                  | $t_3$                               | $t_4$                               | $t_5$                                |
| <b>ENROLMENT:</b>                          |                        |                        |            |                                        |                                     |                                     |                                      |
| Eligibility screen                         | X                      |                        |            |                                        |                                     |                                     |                                      |
| Informed consent                           | X                      |                        |            |                                        |                                     |                                     |                                      |
| Randomisation                              |                        |                        | X          |                                        |                                     |                                     |                                      |
| <b>3 WEEKS INTERVENTION:</b>               |                        |                        |            |                                        |                                     |                                     |                                      |
| <i>[Control group]</i>                     |                        |                        |            | ↔                                      |                                     |                                     |                                      |
| <i>[Robotic-assisted training group]</i>   |                        |                        |            | ↔                                      |                                     |                                     |                                      |
| <b>ASSESSMENTS:</b>                        |                        |                        |            |                                        |                                     |                                     |                                      |
| <i>[DASH<sup>1</sup> first outcome]</i>    |                        | X                      |            | X                                      | X                                   | X                                   | X                                    |
| <i>[WMFT-O<sup>2</sup> second outcome]</i> |                        | X                      |            | X                                      |                                     |                                     |                                      |
| <i>[ROM<sup>3</sup>]</i>                   |                        | X                      |            | X                                      |                                     |                                     |                                      |
| <i>[Ability to work]</i>                   |                        | X                      |            | X                                      | X                                   | X                                   | X                                    |
| <i>[SOMC<sup>4</sup>]</i>                  |                        | X                      |            |                                        |                                     |                                     |                                      |
| <i>[descriptive data<sup>5</sup>]</i>      |                        | X                      |            |                                        |                                     |                                     |                                      |

<sup>1</sup> Disability of the Arm, Shoulder and Hand questionnaire; <sup>2</sup> Wolf-Motor-Function-Test-Orthopaedics; <sup>3</sup> Range of Motion; <sup>4</sup> Short-Orientation-Memory-Concentration Test; <sup>5</sup> sex, age, body mass index, handedness, date and type of fracture and date of surgical treatment
